# Supplementary material for: Fast optical-resolution photoacoustic microscopy using a 2-axis water-proofing MEMS scanner
Source: PubMed Central journal article supplement — Sci Rep. 2015 Jan 21;5:7932. doi: 10.1038/srep07932 (PMC4300456; doi:10.1038/srep07932), 2015-01-21
Supplement: srep07932-s1.pdf [file srep07932-s1.pdf]

## SUPPLEMENTARY INFORMATION

### **Fast optical-resolution photoacoustic microscopy using a 2-axis water-proofing MEMS scanner**

Jin Young Kim<sup>1†</sup>, Changho Lee<sup>2†</sup>, Kyungjin Park<sup>3</sup>, Geunbae Lim<sup>1,3,\*</sup>, and Chulhong Kim<sup>1,2,3,\*</sup>

<sup>1</sup>Department of Mechanical Engineering, Pohang University of Science and Technology (POSTECH), Pohang, 790-784, Republic of Korea

<sup>2</sup>Department of Creative IT Engineering, Pohang University of Science and Technology (POSTECH), Pohang, 790-784, Republic of Korea

<sup>3</sup>School of Interdisciplinary Bioscience and Bioengineering, Pohang University of Science and Technology (POSTECH), Pohang, 790-784, Republic of Korea

<sup>†</sup>These authors contributed equally to this work.

\*Correspondence and requests for materials should be addressed to C.K. ([chulhong@postech.ac.kr](mailto:chulhong@postech.ac.kr)) and G.L. ([limmems@postech.ac.kr](mailto:limmems@postech.ac.kr))

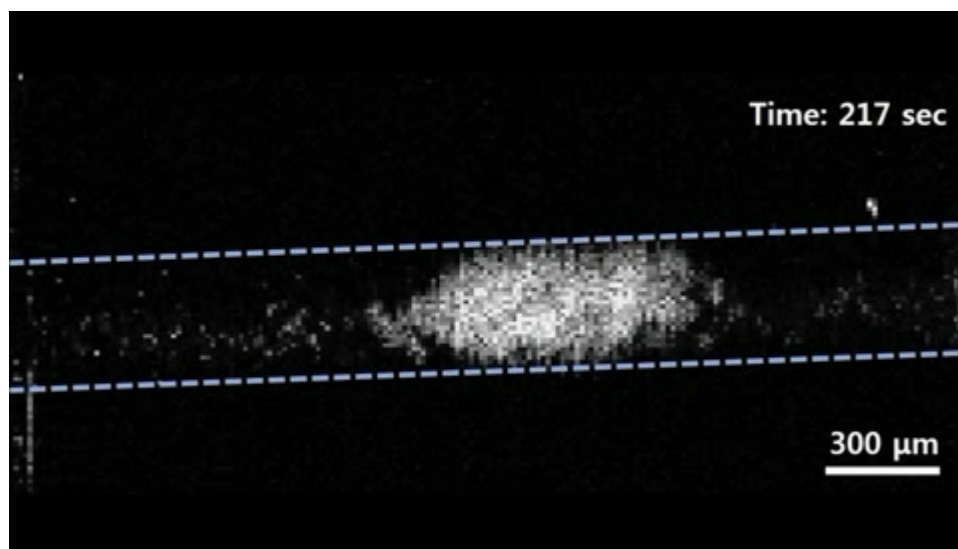

**Supplementary Video. S1.** *In vitro* PA monitoring movie of flow of aggregated carbon particles in a silicone tube. Display rate of the movie is 0.14 frame/s. The measured flow speed of the carbon particles' solution was 0.04 mm/s.
